# Supplementary material for: The efficacy and safety of peripheral intravenous parenteral nutrition vs 10% glucose in preterm infants born 30 to 33 weeks’ gestation: a randomised controlled trial
Source: Springer Nature journal article supplement (doi:10.1186/s12887-020-02280-w), 2020-08-17
Supplement: MOESM1 [file 18288426]

## **Additional File**

This appendix has been provided by the authors to give readers additional information about their work.

**Supplement to: The efficacy and safety of peripheral intravenous parenteral nutrition and lipids vs 10% glucose in preterm infants born 30 to 33 weeks' gestation: a randomised controlled trial.**

### **Contents**

|                                                                                            |          |
|--------------------------------------------------------------------------------------------|----------|
| <b>Supplementary Table 1. Baseline characteristics .....</b>                               | <b>2</b> |
| <b>Supplementary Table 2. Parenteral and enteral intake over 21 day study period .....</b> | <b>3</b> |
| <b>Supplementary Table 3. Clinical outcomes .....</b>                                      | <b>5</b> |
| <b>Supplementary Table 4. Peripheral intravenous cannulae.....</b>                         | <b>5</b> |
| <b>Supplementary Table 5. Mean biochemical measures by day of life and overall.....</b>    | <b>6</b> |
| <b>Supplementary Table 6. Biochemical measures outside normal clinical parameters ..</b>   | <b>8</b> |

**Supplementary Table 1. Baseline characteristics**

| <b>Variable</b>                                                                  | <b>P-PN<br/>(n=42)</b> | <b>Control<br/>(n=50)</b> |
|----------------------------------------------------------------------------------|------------------------|---------------------------|
| <b>Maternal</b>                                                                  |                        |                           |
| Caesarean section in labor                                                       | 9 (21)                 | 5 (10)                    |
| Caesarean section, no labor                                                      | 19 (45)                | 30 (60)                   |
| Antenatal steroids – complete course                                             | 19 (45)                | 22 (44)                   |
| <b>Infant characteristics</b>                                                    |                        |                           |
| <i>Birth order</i>                                                               |                        |                           |
| Singleton                                                                        | 18 (43)                | 32 (64)                   |
| First of a multiple                                                              | 9 (21)                 | 11 (22)                   |
| Second of a multiple                                                             | 14 (33)                | 5 (10)                    |
| Third of a multiple                                                              | 1 (2)                  | 2 (4)                     |
| <i>Apgar score</i>                                                               |                        |                           |
| At 1 minute, median (IQR), (n=41/50)                                             | 7 (6 - 9)              | 7 (6 - 8)                 |
| <i>Temperature</i>                                                               |                        |                           |
| On admission, mean, SD                                                           | 36.4 (0.5)             | 36.4 (0.5)                |
| Admission temperature $\leq 36.5^{\circ}\text{C}$                                | 20 (48)                | 28 (45)                   |
| Admission temperature $\geq 36.5^{\circ}\text{C}$ to $\leq 37.4^{\circ}\text{C}$ | 21 (50)                | 21 (42)                   |
| Admission temperature $> 37.4^{\circ}\text{C}$                                   | 1 (2)                  | 1 (2)                     |
| <i>Baseline biochemistry</i>                                                     |                        |                           |
| Blood urea nitrogen, mmol/L, mean (SD) (n=37/42)                                 | 4.6 (1.5)              | 4.5 (1.6)                 |
| Albumin, g/L, mean (SD) (n=41/41)                                                | 24.6 (3.2)             | 25.4 (3.0)                |
| Triglyceride, mmol/L, median (IQR) (n=40/42)                                     | 0.6 (0.5-0.6)          | 0.6 (0.4-0.7)             |
| pH, mean (SD) (n=42/47)                                                          | 7.4 (0.0)              | 7.4 (0.1)                 |
| Base excess, mean (SD) (n=42/47)                                                 | -1.8 (1.7)             | -2.3 (2.3)                |
| Blood glucose level, mmol/L, mean (SD) (n=42/47)                                 | 4.8 (1.1)              | 4.4 (1.4)                 |

Data are presented as n (%) unless otherwise indicated

**Supplementary Table 2. Parenteral and enteral intake over 21 day study period**

| <b>Outcome</b>                            | <b>P-PN<br/>(n=42)</b> | <b>Control<br/>(n=50)</b> | <b>Adjusted<br/>mean difference<sup>a</sup><br/>(95% CI)</b> | <b>P<sup>a</sup></b> |
|-------------------------------------------|------------------------|---------------------------|--------------------------------------------------------------|----------------------|
| <b>Week 1</b>                             |                        |                           |                                                              |                      |
| <b><i>Parenteral</i></b>                  |                        |                           |                                                              |                      |
| Protein (g/kg/d)                          | 1.1 (0.4)              | 0.0 (0.1)                 | 1.10 (1.0, 1.2)                                              | <0.0001              |
| Lipid (g/kg/d)                            | 1.1 (0.3)              | 0.0 (0.2)                 | 1.1 (1.0, 1.2)                                               | <0.0001              |
| Energy (kcal/kg/d) <sup>b</sup>           | 29.3 (9.5)             | 18.5 (6.6)                | 1.6 (1.4, 1.9) <sup>c</sup>                                  | <0.0001              |
| <b><i>Enteral<sup>d</sup></i></b>         |                        |                           |                                                              |                      |
| Protein (g/kg/d) (n=41/50)                | 1.0 (0.5)              | 1.0 (0.5)                 | 0.0 (-0.2, 0.2)                                              | 0.9                  |
| Lipid (g/kg/d) (n=41/50)                  | 2.2 (0.9)              | 2.4 (0.8)                 | -0.1 (-0.5, 0.2)                                             | 0.5                  |
| Energy (kcal/kg/d) <sup>b</sup> (n=41/50) | 41.2 (16.5)            | 42.8 (15.1)               | 0.9 (0.7, 1.2) <sup>c</sup>                                  | 0.4                  |
| <b>Week 2<sup>e</sup></b>                 |                        |                           |                                                              |                      |
| <b><i>Enteral<sup>d</sup></i></b>         |                        |                           |                                                              |                      |
| Protein (g/kg/d) (n=40/47)                | 3.3 (0.6)              | 3.4 (0.5)                 | -0.1 (-0.3, 0.2)                                             | 0.5                  |
| Lipid (g/kg/d) (n=40/47)                  | 6.4 (0.9)              | 6.7 (0.6)                 | -0.3 (-0.7, 0.0)                                             | 0.09                 |
| Energy (kcal/kg/d) <sup>b</sup> (n=40/47) | 124.5 (16.8)           | 129.5 (11.7)              | 1.0 (0.9, 1.0) <sup>c</sup>                                  | 0.08                 |
| <b>Week 3<sup>f</sup></b>                 |                        |                           |                                                              |                      |
| <b><i>Enteral intake</i></b>              |                        |                           |                                                              |                      |
| Protein (g/kg/d) (n=37/43)                | 3.6 (0.4)              | 3.5 (0.5)                 | 0.1 (-0.1, 0.3)                                              | 0.3                  |
| Lipid (g/kg/d) (n=37/43)                  | 6.7 (1.0)              | 6.7 (1.0)                 | 0.0 (-0.3, 0.4)                                              | 0.9                  |
| Energy (kcal/kg/d) (n=37/43)              | 133.5 (15.2)           | 132.1 (10.4)              | 1.0 (1.0, 1.1)                                               | 0.7                  |

Data are presented as mean (SD)

<sup>a</sup> Adjusted for sex and gestational age at birth

<sup>b</sup> Log-transformed due to heterogeneous residual variance

| <b>Outcome</b> | <b>P-PN<br/>(n=42)</b> | <b>Control<br/>(n=50)</b> | <b>Adjusted<br/>mean difference<sup>a</sup><br/>(95% CI)</b> | <b>P<sup>a</sup></b> |
|----------------|------------------------|---------------------------|--------------------------------------------------------------|----------------------|
|----------------|------------------------|---------------------------|--------------------------------------------------------------|----------------------|

<sup>c</sup> Effects are ratio of geometric means

<sup>d</sup> Intake data not collected because of transfer to another hospital or discharge home: PPN – Transferred week 1 n=1, week 2 n=1, week 3 n=1; Discharged home week 3 n=2; Control - Transferred week 2 n=2, week 3 n=1; Discharged home week 2 n=1, week 3 n=3;

<sup>e</sup> Data not reported for parenteral intake as 7 infants in P-PN and 6 infants in control had parenteral intake in week 2

<sup>f</sup> No infants had parenteral intake in week 3

**Supplementary Table 3. Clinical outcomes**

| Outcome                      | P-PN (n=42) | Control (n=50) | P-value <sup>a</sup> |
|------------------------------|-------------|----------------|----------------------|
|                              | N (%)       | N (%)          |                      |
| Oxygen at discharge home     | 0 (0.0)     | 2 (4.0)        | 0.5                  |
| Intraventricular haemorrhage | 1 (2.4)     | 0 (0.0)        | 0.5                  |
| Necrotising enterocolitis    | 0 (0.0)     | 1 (2.0)        | 1.0                  |

<sup>a</sup> Due to low counts, groups compared using Fisher's exact test

**Supplementary Table 4. Peripheral intravenous cannulae**

| Outcome                                                | P-PN (n=42) | Control (n=50) | Adjusted effect<br>(95% CI) <sup>a</sup> | P-value <sup>a</sup> |
|--------------------------------------------------------|-------------|----------------|------------------------------------------|----------------------|
| Length of time peripheral IV required (days), mean, SD | 5.9 (1.9)   | 5.7 (1.3)      | 1.0 (0.9, 1.2) <sup>b</sup>              | 0.5                  |
| Peripheral IV infiltration <sup>c</sup> , n,%          | 24 (57)     | 32 (64)        | 0.8 (0.3, 1.8) <sup>d</sup>              | 0.5                  |
| Peripheral cannula, number required, mean, SD          | 2.1 (1.1)   | 2.2 (0.9)      | 1.1 (0.9, 1.3) <sup>b</sup>              | 0.3                  |

<sup>a</sup> Adjusted for sex and gestational age at birth

<sup>b</sup> Ratio of means (95% CI)

<sup>c</sup> IV classification stage  $\geq 1$  (Montgomery LA, Hanrahan K, Kottman K et al. Guideline for IV infiltrations in pediatric patients. *Pediatric Nursing*. 1999;25(2):167-180.)

<sup>d</sup> Odds ratio (95% CI)

**Supplementary Table 5. Mean biochemical measures by day of life and overall**

| Outcome                            | Day     | P-PN (n=42) |            | Control (n=50) |                        | P <sup>a</sup><br>(interaction) | Adjusted mean<br>difference <sup>a</sup> (95% CI) | P <sup>a</sup>   |
|------------------------------------|---------|-------------|------------|----------------|------------------------|---------------------------------|---------------------------------------------------|------------------|
|                                    |         | n           | Mean (SD)  | n              | Mean (SD)              |                                 |                                                   |                  |
| Blood Urea Nitrogen, mmol/L        | 2       | 39          | 5.3 (1.8)  | 43             | 4.0 (2.0)              |                                 | 1.2 (0.7, 1.7)                                    | <0.0001          |
|                                    | 4       | 39          | 5.4 (1.6)  | 45             | 2.6 (1.5)              |                                 | 2.7 (2.1, 3.2)                                    | <0.0001          |
|                                    | 7       | 32          | 4.7 (2.0)  | 43             | 3.6 (1.8)              |                                 | 1.1 (0.2, 2.0)                                    | 0.02             |
|                                    | 14      | 27          | 5.0 (1.3)  | 36             | 4.7 (1.6)              |                                 | 0.3 (-0.4, 0.9)                                   | 0.5              |
|                                    | 21      | 20          | 4.1 (1.2)  | 30             | 3.7 (1.0)              |                                 | 0.5 (-0.2, 1.3)                                   | 0.1              |
|                                    | Overall |             |            | 5.0 (1.7)      |                        | 3.7 (1.8)                       | <0.0001                                           |                  |
| Albumin, g/L                       | 2       | 41          | 25.1 (3.1) | 44             | 25.9 (3.2)             |                                 |                                                   |                  |
|                                    | 4       | 41          | 26.8 (3.8) | 45             | 26.8 (3.1)             |                                 |                                                   |                  |
|                                    | 7       | 37          | 27.8 (2.5) | 46             | 27.9 (2.6)             |                                 |                                                   |                  |
|                                    | 14      | 32          | 27.6 (1.9) | 37             | 27.5 (2.1)             |                                 |                                                   |                  |
|                                    | 21      | 24          | 26.7 (1.7) | 33             | 26.9 (1.9)             |                                 |                                                   |                  |
|                                    | Overall |             |            | 26.7 (3.0)     |                        | 27.0 (2.7)                      | 0.1                                               | 0.2 (-0.5, 0.8)  |
| Triglyceride <sup>b</sup> , mmol/L | 2       | 40          | 1.0 (0.4)  | 46             | 0.6 (0.5) <sup>c</sup> |                                 | 1.7 (1.4, 2.0)                                    | <0.0001          |
|                                    | 4       | 41          | 1.1 (0.3)  | 46             | 0.8 (0.3) <sup>c</sup> |                                 | 1.4 (1.2, 1.6)                                    | <0.0001          |
|                                    | 7       | 36          | 1.0 (0.3)  | 46             | 1.2 (0.4) <sup>c</sup> |                                 | 0.9 (0.7, 1.0)                                    | 0.02             |
|                                    | 14      | 32          | 0.7 (0.2)  | 38             | 0.8 (0.3) <sup>c</sup> |                                 | 0.9 (0.8, 1.0)                                    | 0.05             |
|                                    | 21      | 24          | 0.7 (0.3)  | 33             | 0.8 (0.3) <sup>c</sup> |                                 | 0.9 (0.8, 1.1)                                    | 0.4              |
|                                    | Overall |             |            | 0.9 (0.3)      |                        | 0.9 (0.4) <sup>c</sup>          | <0.0001                                           |                  |
| pH                                 | 2       | 42          | 7.4 (0.1)  | 49             | 7.4 (0.0)              |                                 |                                                   |                  |
|                                    | 4       | 41          | 7.4 (0.0)  | 48             | 7.4 (0.0)              |                                 |                                                   |                  |
|                                    | 7       | 37          | 7.4 (0.0)  | 46             | 7.4 (0.0)              |                                 |                                                   |                  |
|                                    | 14      | 32          | 7.4 (0.0)  | 38             | 7.4 (0.0)              |                                 |                                                   |                  |
|                                    | 21      | 27          | 7.4 (0.0)  | 33             | 7.4 (0.0)              |                                 |                                                   |                  |
|                                    | Overall |             |            | 7.4 (0.0)      |                        | 7.4 (0.0)                       | 0.07                                              | -0.0 (-0.0, 0.0) |
| Base Excess                        | 2       | 42          | -2.1 (2.1) | 49             | -2.2 (1.7)             |                                 |                                                   |                  |

| Outcome                     | Day     | P-PN (n=42) |            | Control (n=50) |            | P <sup>a</sup><br>(interaction) | Adjusted mean<br>difference <sup>a</sup> (95% CI) | P <sup>a</sup> |
|-----------------------------|---------|-------------|------------|----------------|------------|---------------------------------|---------------------------------------------------|----------------|
|                             |         | n           | Mean (SD)  | n              | Mean (SD)  |                                 |                                                   |                |
|                             | 4       | 41          | -2.6 (2.2) | 48             | -2.7 (1.8) |                                 |                                                   |                |
|                             | 7       | 37          | -0.7 (2.0) | 46             | -1.1 (2.6) |                                 |                                                   |                |
|                             | 14      | 32          | 1.6 (1.8)  | 38             | 0.9 (2.0)  |                                 |                                                   |                |
|                             | 21      | 27          | 1.9 (1.7)  | 33             | 1.1 (1.8)  |                                 |                                                   |                |
|                             | Overall |             | -0.7 (2.7) |                | -1.0 (2.5) | 0.4                             | 0.2 (-0.2, 0.7)                                   | 0.3            |
| Blood glucose level, mmol/L | 2       | 42          | 4.4 (1.2)  | 49             | 4.6 (1.1)  |                                 |                                                   |                |
|                             | 4       | 42          | 5.1 (1.0)  | 48             | 5.5 (1.4)  |                                 |                                                   |                |
|                             | 7       | 38          | 5.4 (1.1)  | 47             | 5.3 (1.2)  |                                 |                                                   |                |
|                             | 14      | 32          | 5.3 (1.0)  | 38             | 5.3 (0.8)  |                                 |                                                   |                |
|                             | 21      | 27          | 5.0 (0.8)  | 33             | 5.0 (1.1)  |                                 |                                                   |                |
|                             | Overall |             | 5.0 (1.1)  |                | 5.1 (1.2)  | 0.5                             | -0.0 (-0.3, 0.2)                                  | 0.8            |

<sup>a</sup> adjusted for sex, gestational age at birth and corresponding baseline measure

<sup>b</sup> log-transformed due to heterogeneous residual variance

<sup>c</sup> effects are ratio of geometric means

**Supplementary Table 6. Biochemical measures outside normal clinical parameters<sup>a</sup>**

| Outcome                                                 | Day     | P-PN (n=42) | Control (n=50)       | P-value <sup>b</sup> |
|---------------------------------------------------------|---------|-------------|----------------------|----------------------|
|                                                         |         | N (%)       | N (%)                |                      |
| High blood urea nitrogen<br>(>14.3 mmol/L) <sup>c</sup> | 2       | 0 (0.0)     | 0 (0.0)              |                      |
|                                                         | 4       | 0 (0.0)     | 0 (0.0)              |                      |
|                                                         | 7       | 0 (0.0)     | 0 (0.0)              |                      |
|                                                         | 14      | 0 (0.0)     | 0 (0.0)              |                      |
|                                                         | 21      | 0 (0.0)     | 0 (0.0)              |                      |
|                                                         | Overall | 0 (0.0)     | 0 (0.0)              |                      |
| Low serum albumin<br>(<18 g/L) <sup>c</sup>             | 2       | 2 (4.8)     | 0 (0.0)              |                      |
|                                                         | 4       | 1 (2.4)     | 0 (0.0)              |                      |
|                                                         | 7       | 0 (0.0)     | 0 (0.0)              |                      |
|                                                         | 14      | 0 (0.0)     | 0 (0.0)              |                      |
|                                                         | 21      | 0 (0.0)     | 0 (0.0)              |                      |
|                                                         | Overall | 2 (4.8)     | 0 (0.0)              |                      |
| Hypertriglyceridemia<br>(>2.25 mmol/L) <sup>d</sup>     | 2       | 1 (2.4)     | 1 (2.0) <sup>f</sup> |                      |
|                                                         | 4       | 0 (0.0)     | 0 (0.0)              |                      |
|                                                         | 7       | 1 (2.4)     | 1 (2.0) <sup>f</sup> |                      |
|                                                         | 14      | 0 (0.0)     | 0 (0.0)              |                      |
|                                                         | 21      | 0 (0.0)     | 0 (0.0)              |                      |
|                                                         | Overall | 2 (4.8)     | 2 (4.0)              |                      |
| Hyperglycemia<br>(>8.3 mmol/L) <sup>c</sup>             | 2       | 1 (2.4)     | 0 (0.0)              |                      |
|                                                         | 4       | 0 (0.0)     | 1 (2.0)              |                      |
|                                                         | 7       | 1 (2.4)     | 2 (4.0)              |                      |
|                                                         | 14      | 1 (2.4)     | 0 (0.0)              |                      |
|                                                         | 21      | 0 (0.0)     | 0 (0.0)              |                      |
|                                                         | Overall | 2 (4.8)     | 3 (6.0)              |                      |



| <b>Outcome</b>                                                       | <b>Day</b>     | <b>P-PN (n=42)<br/>N (%)</b> | <b>Control (n=50)<br/>N (%)</b> | <b>P-value<sup>b</sup></b> |
|----------------------------------------------------------------------|----------------|------------------------------|---------------------------------|----------------------------|
| Metabolic acidosis<br>(pH <7.25 and/or Base Excess <-5) <sup>c</sup> | 2              | 3 (7.1)                      | 2 (4.0)                         |                            |
|                                                                      | 4              | 4 (9.5)                      | 2 (4.0)                         |                            |
|                                                                      | 7              | 0 (0.0)                      | 3 (6.0)                         |                            |
|                                                                      | 14             | 0 (0.0)                      | 0 (0.0)                         |                            |
|                                                                      | 21             | 0 (0.0)                      | 0 (0.0)                         |                            |
|                                                                      | <b>Overall</b> | <b>7 (16.7)</b>              | <b>6 (12.0)</b>                 | <b>0.6</b>                 |

<sup>a</sup> Only descriptive summary shown due to low counts

<sup>b</sup> from Fisher's exact test

<sup>c</sup> cut-off limits as used in: Osborn DA, Schindler T, Jones LJ, Sinn JKH, Bolisetty S. Higher versus lower amino acid intake in parenteral nutrition for newborn infants. Cochrane Database of Systematic Reviews. 2018; Issue 3. Art. No.: CD005949. DOI: 10.1002/14651858.CD005949.pub2.

<sup>d</sup> limit as used in: Kapoor V, Malviya MN, Soll R. Lipid emulsions for parenterally fed preterm infants. Cochrane Database of Systematic Reviews. 2019; Issue 6. Art. No.: CD013163. DOI: 10.1002/14651858.CD013163.pub2.

<sup>e</sup> no P-value obtained since no participant in the study had a high blood urea nitrogen

<sup>f</sup> Infant did not receive intravenous SMOFlipid
